# Supplementary material for: Measurement Uncertainty Impacts Diagnosis of Diabetes Mellitus: Reliable Minimal Difference of Plasma Glucose Results
Source: Springer Nature journal article supplement (doi:10.1007/s13300-019-00740-w), 2019-12-16
Supplement: MOESM1 [file 17742106]

**Supplement S 3:** Distribution of  $MD_{\text{cut-off}}$  at the concentrations of the applied control material for the individual instruments during the study period of ten years. The 95th percentile  $MD_{\text{cut-off}}$  values are given above the boxplots.

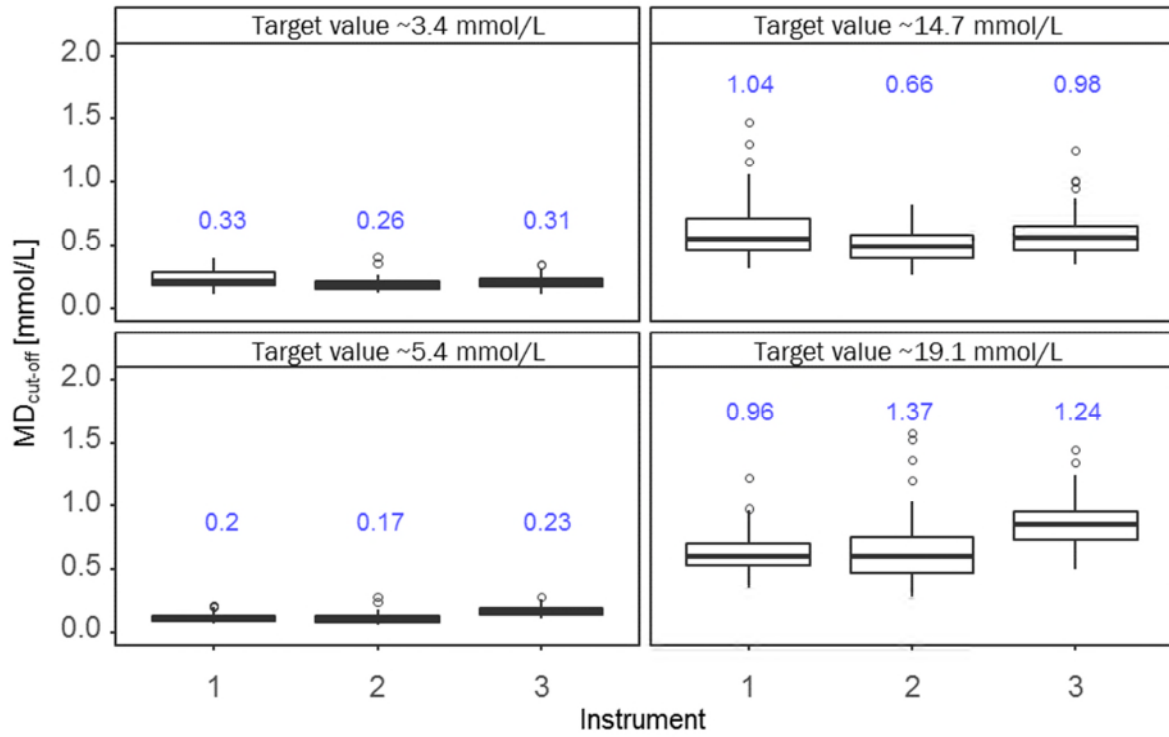

**Supplement S 4:** Results for glucose displayed by instruments aggregated over the study period. Horizontal solid lines represent target values, dashed lines represent Rili-BAEK-limits and horizontal dotted lines represent maximum  $MD_{\text{cut-off } 7.0}$ .

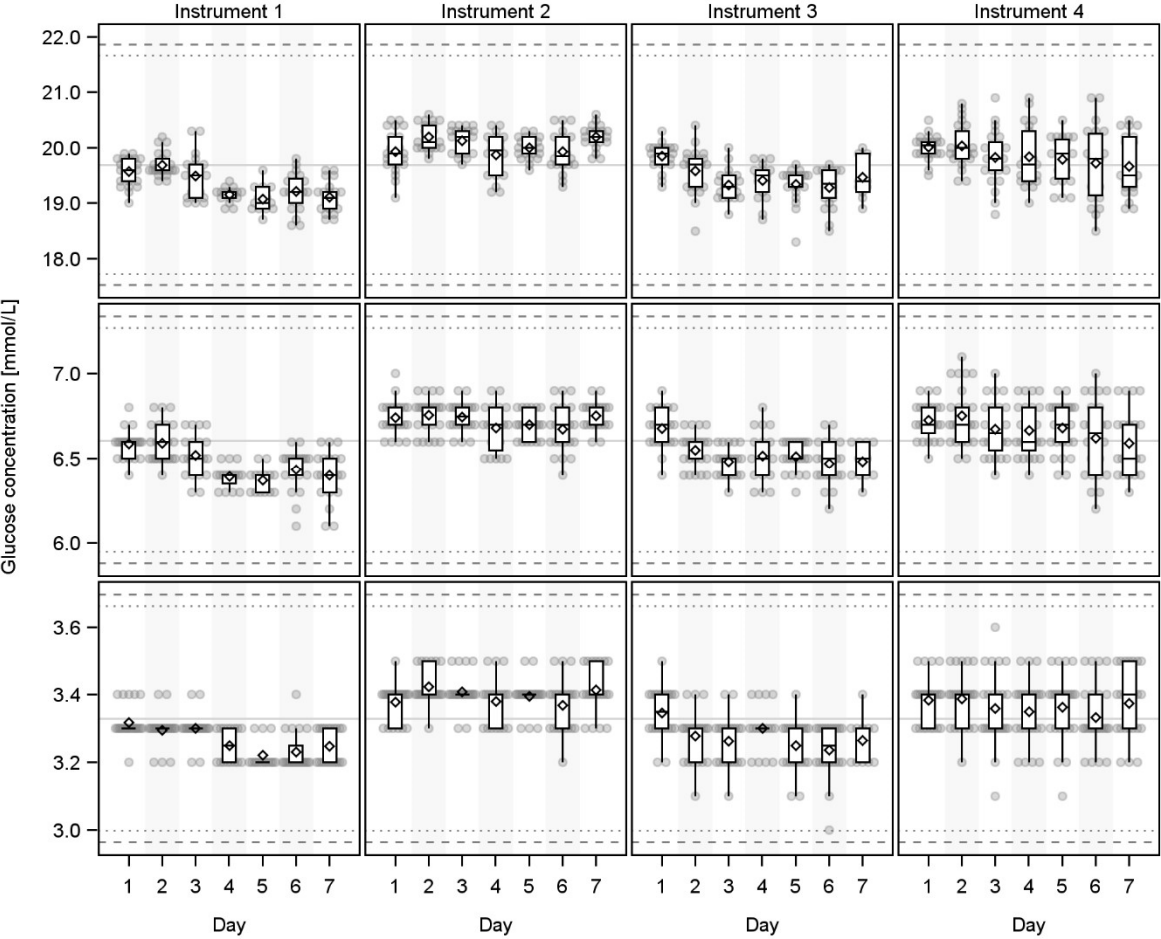

```
##### Suppl. S1 - "Measurement uncertainty impacts diagnosis of diabetes mellitus: reliable minimal difference of plasma glucose results",  
# by Sandra Keutmann, Stephanie Zylla, Mathilde Dahl, Nele Friedrich, Rüdiger Landgraf, Lutz Heinemann, Anders Kallner, Matthias Nauck, Astrid Petersmann  
#####
```

```
library(readxl)  
library(ggplot2)  
require(ply)  
library(export)  
library(qdapTools) # lookup  
library(tidyverse)  
library(okcupiddata)  
library(reshape)  
library(dplyr)  
library(data.table)  
library(rlang)  
library(agricolae) # HSD test  
library(broom)
```

```
#####  
#####  
####  
#### Long term study  
####  
#####  
#####
```

```
### Data #####  
mdall<- read_excel("qk_gluk_gesamt.xlsx", sheet=1,col_names=T)  
mdall <- dplyr::filter(mdall, KONTRSERUMID == "MU1" | KONTRSERUMID == "MU3" |  
KONTRSERUMID == "M1" | KONTRSERUMID == "M2")  
mdall <- filter(mdall, GERAET == "Caesar (SN 367)" | GERAET == "Dieter (SN  
385)" | GERAET == "Ede (SN 541)")
```

```
### table for mashine (geraet), QC level (KONTRSERUMID), month and CHARGENNR  
table <- ddply(mdall, c("GERAET", 'KONTRSERUMID', 'MONAT', 'JAHR', 'CHARGENNR'),  
summarise,  
median = median(ERGENISF),  
mean = mean(ERGENISF),  
SD = sd(ERGENISF),  
MD = SD*2, ### only when comparing to ref material !  
mean_ref_SOLLWERT = mean(SOLLWERT),  
sd_ref_SOLLWERT = sd(SOLLWERT),  
MD_pct = MD/mean_ref_SOLLWERT*100,  
N = length(ERGENISF),  
Q05 = round(quantile(ERGENISF, .05), digits = 2),  
Q95 = round(quantile(ERGENISF, .95), digits = 2)  
)
```

```
#### Remove outliers
```

```

table <- table[c(-176,-453),]

### Only those with > 14 measurments per MD cycle
table <- table[which(table$N > 14),]

boxplot_table_targetvalues <- ddply(table, c('KONTRSERUMID'), summarise,
  median = median(MD),
  mean = mean(MD),
  N = length(MD),
  target = mean(mean_ref_SOLLWERT),
  Q05 = round(quantile(MD, .05), digits = 2),
  Q95 = round(quantile(MD, .95), digits = 2)
)

boxplot_table_mashine <- ddply(table, c('GERAET','KONTRSERUMID'), summarise,
  median = median(MD),
  mean = mean(MD),
  N = length(MD),
  Q05 = round(quantile(MD, .05), digits = 2),
  Q95 = round(quantile(MD, .95), digits = 2)
)

sum_N <- ddply(table, c('KONTRSERUMID'), summarise,
  sum = sum(N),
  mean = mean(mean_ref_SOLLWERT)
)

sum_percent <- ddply(table, c('KONTRSERUMID'), summarise,
  MD_pct_av = mean(MD_pct),
  sd_pct_av = sd(MD_pct)
)

sum_percent_mashine <- ddply(table, c('GERAET','KONTRSERUMID'), summarise,
  MD_pct_av = mean(MD_pct),
  sd_pct_av = sd(MD_pct)
)

table_MU1_M3 <- table[, c('KONTRSERUMID', 'MONAT','JAHR')]
table_MU1_M3 <-unique(table_MU1_M3)

#### TWO-way ANOVA
table$combi <- paste(table$GERAET, table$JAHR)
MU1 <- table[which(table$KONTRSERUMID == 'MU1'),]
MU3 <- table[which(table$KONTRSERUMID == 'MU3'),]
M1 <- table[which(table$KONTRSERUMID == 'M1'),]
M2 <- table[which(table$KONTRSERUMID == 'M2'),]
material_list <- list(M1, M2, MU1, MU3)
summary(material_list)

name_list <- c('M1', 'M2', 'MU1', 'MU3')

for(i in 1:length(material_list)){

```

```

dat <- as.data.frame(material_list[i])
fit <- lm(MD_pct ~ GERAET , data = dat) # GERAET or JAHR
aov1 <- aov(fit)
print(summary(aov1) )
# Tukey Honestly Significant Differences
group_test <- HSD.test(aov1, 'GERAET') # GERAET or JAHR
print(group_test)
}

fit <- lm(MD_pct ~ GERAET , data = tabel) # GERAET or JAHR
aov1 <- aov(fit)
print(summary(aov1) )
# Tukey Honestly Significant Differences
group_test <- HSD.test(aov1, 'GERAET') # GERAET or JAHR
print(group_test)

#####
### PLOTTING
#####
plot <- table
plot2 <- boxplot_table_targetvalues[,c(5,7)]

#### Per machine
#####

p <- ggplot(plot, aes(x = GERAET, y = MD))+
  geom_boxplot(outlier.shape = 1)+#ggtitle(label = "MDcut-off QC material long
2009-2018")+
  theme_bw()+ theme(panel.grid = element_blank())+ ylim(0,2)+
  scale_x_discrete(labels=c("1", "2", "3"))+ xlab('Measuring system')+
  ylab('MDcut-off [mmol/L]')+ facet_wrap(.~KONTRSERUMID)
p

##### Old and new controles
#####

plot$KONTRSERUMID_sort <- factor(plot$KONTRSERUMID, levels = c("M1", "MU1", "M2",
"MU3"))
plot$KONTRSERUMID <- as.character(plot$KONTRSERUMID)

#### SUPER smart lookup!!!
ave <- sum_N[,c(1,3)]
categories = round(ave$mean,1)
names(categories) = ave$KONTRSERUMID

plot$lab = categories[plot$KONTRSERUMID]
unique(plot$lab) # 5.4 14.7 3.4 19.1
plot$lab <- factor(plot$lab, levels = c("3.4", "5.4", "14.7", "19.1"))

```

```

p2 <- ggplot(plot, aes(x = lab, y = MD))+
  geom_boxplot(outlier.shape =1)+ ggtitle(label = "MDcut-off QC material long
2009-2018")+
  theme_bw()+ theme(panel.grid = element_blank()+
  ylim(0,2) + xlab('Target value')+ ylab('MDcut-off [mmol/L]'))
p2

### adding N in the plot

meds <- c(8,8,8,8)
names(meds) <- c('M1', 'M2', 'MU1', 'MU3')

p3 <- ggplot(plot, aes(x = KONTRSERUMID, y = MD_pct))+
  geom_boxplot()+ ggtitle(label = "MD for QC material", subtitle = "01.01.2009 -
31.12.2018")+
  theme(axis.text.x= element_text(angle=45, hjust = 1.3, vjust = 1.2))+
xlab('')+ylab('MD[%]')
p3 <- p3 +geom_text(data=data.frame(), aes(x=names(meds), y=meds,
label=as.character(sum_N$sum)), col='blue', size=4,
  vjust = 1)
p3

#### Per cent
p4 <- ggplot(plot, aes(x = lab, y = MD_pct))+
  geom_boxplot(outlier.shape =1)+ #ggtitle(label = "MD for QC material",
subtitle = "01.01.2009 - 31.12.2018")+
  theme_bw()+ theme(axis.text.x= element_text(angle=45, hjust = 1.3, vjust =
1.2),panel.grid = element_blank()+ xlab('')+ylab('MD[%]')+ ylim(0,8)
p4 #<- p4+geom_text(data=data.frame(), aes(x=names(meds), y=meds,
label=as.character(sum_N$sum)), col='blue', size=4, vjust = 15)
p4

### Linear regression

p5 <- ggplot(plot2, aes(x = target, y = Q95))+ geom_point()+
  geom_smooth(method='lm') + geom_hline(yintercept =0.442) +
  geom_vline(xintercept =7.0)+theme_bw()
p5

## adding the lines for 7.0 mmol/L
#####
# Equation see below
#0.065*x -0.013 = y
#x = 7 ; (0.065*7)-0.013 = 0.442 = y

x <- 7.0
y <- 0.442
# then you can use:
plot(x = plot2$target, y = plot2$Q95, pch = 1, cex=1.5,xaxt='n', xlab = 'Glucose
concentration [mmol/L]', ylab = 'MD cut-off [mmol/L]')
axis(side = 1, at=c(5,7,10,15))
lines(x=c(x,x), y=c(0,y), lwd=1,lty = 2)

```

```

lines(x=c(0,x), y=c(y,y), lwd=1, lty = 2)
lm(plot2$Q95 ~ plot2$target)
abline(-0.01338, 0.06525,lwd=1, col= 'blue')
abline(h=0.70,lwd=1,lty = 2 )
### get the equation

lm_eqn <- function(df){
  m <- lm(y ~ x, df);
  eq <- substitute(italic(y) == a + b %.% italic(x)*", "~italic(r)^2~"=~r2,
                    list(a = format(coef(m)[1], digits = 2),
                          b = format(coef(m)[2], digits = 2),
                          r2 = format(summary(m)$r.squared, digits = 3)))
  as.character(as.expression(eq));
}

stat <- plot2
names(stat) <- c('x', 'y')
p5 <- p5 + geom_text(x = 10, y = 0.5, label = lm_eqn(stat), parse = TRUE)
p5

### Export to PowerPoint
#####
#####
#####
graph2ppt(x= p ,file="MDlong.pptx", width=8, height=5)
graph2ppt(x= p2 ,file="MDlong.pptx", width=8, height=5, append=T)
graph2ppt(x= p3 ,file="MDlong.pptx", width=8, height=5, append=T)
graph2ppt(x= p4 ,file="MDlong.pptx", width=8, height=5, append=T)

#####
#####
####
####          Short term study
####
#####
#####

##### DATA
md.short <- read_excel("2019 Mar 31 short term data glucose.xlsx",
sheet=1,col_names=T)
md.short.clean <- na.omit(md.short)

#5 and 95% percentile system4 medium 6.6 mmol/L
md.short.clean.med.sys4 <- filter(md.short.clean, SYSTEM=="flexlab",
QC._LEVEL=="med" )
round(quantile(md.short.clean.med.sys4$GLUK, .05), digits = 2)
round(quantile(md.short.clean.med.sys4$GLUK, .95), digits = 2)
round(median(md.short.clean.med.sys4$GLUK, na.rm=TRUE), digits = 2)

#5 and 95% percentile system1 medium 6.6 mmol/L
md.short.clean.med.sys1 <- filter(md.short.clean, SYSTEM=="caesar", QC._LEVEL ==

```

```

"med" )
round(quantile(md.short.clean.med.sys1$GLUK, .05), digits = 2)
round(quantile(md.short.clean.med.sys1$GLUK, .95), digits = 2)
round(median(md.short.clean.med.sys1$GLUK, na.rm=TRUE), digits = 2)

#5 and 95% percentile system2 medium 6.6 mmol/L
md.short.clean.med.sys2 <- filter(md.short.clean, SYSTEM=="dieter", QC._LEVEL ==
"med" )
round(quantile(md.short.clean.med.sys2$GLUK, .05), digits = 2)
round(quantile(md.short.clean.med.sys2$GLUK, .95), digits = 2)
round(median(md.short.clean.med.sys2$GLUK, na.rm=TRUE), digits = 2)

#5 and 95% percentile system3 medium 6.6 mmol/L
md.short.clean.med.sys3 <- filter(md.short.clean, SYSTEM=="ede", QC._LEVEL ==
"med" )
round(quantile(md.short.clean.med.sys3$GLUK, .05), digits = 2)
round(quantile(md.short.clean.med.sys3$GLUK, .95), digits = 2)
round(median(md.short.clean.med.sys3$GLUK, na.rm=TRUE), digits = 2)

#qc cycles with n and SD
md.short.clean.grouped <- group_by(md.short.clean, SYSTEM, DAY, QC._LEVEL)
md.short.clean.grouped.sd <- summarise(md.short.clean.grouped, n_per_cycle =
n(), sd_cycle = sd(GLUK))
summary(md.short.clean.grouped.sd)
#qc cycles md
md.short.clean.grouped.md <- mutate(md.short.clean.grouped.sd, md_cycle =
sd_cycle*2)
summary(md.short.clean.grouped.md)

#Anzahl pro Kontrollzyklus eingrenzen, Ausschluss geringe pro Kontrollzyklus
bb <- filter(md.short.clean.grouped.md, n_per_cycle >14)
summary(bb)
ggplot(bb, aes(DAY, QC._LEVEL)) + geom_point()

#subsetting per QC level
summary(bb)
bb.low <- filter(bb, QC._LEVEL == "low")
bb.med <- filter(bb, QC._LEVEL == "med")
bb.upp <- filter(bb, QC._LEVEL == "upp")
boxplot(bb.low$md_cycle, bb.med$md_cycle, bb.upp$md_cycle, las=2, ylab="MD
(cut-off) [mmol/L]", ylim=c(0,2))

bb_all <- rbind(bb.low, bb.med)
bb_all <- rbind(bb_all, bb.upp)

names(bb_all)

cat = c("3.3", "6.6", "19.7")
names(cat) = c("low", "med", "upp")

md.short.clean.grouped$lab = cat[md.short.clean.grouped$QC._LEVEL]
md.short.clean.grouped$lab <- as.numeric(md.short.clean.grouped$lab)

### table for mashine (geraet), QC level (KONTRSERUMID), month and CHARGENN

```



```
table_shot <- ddply(md.short.clean.grouped, c( "SYSTEM","DAY", "QC._LEVEL"),
summarise,
```

```

    median = median(GLUK),
    n_per_cycle = n(),
    mean = mean(GLUK),
    SD = sd(GLUK),
    MD = SD*2, ### only when comparing to ref material !
    mean_ref = mean(lab),
    sd_ref = sd(lab),
    MD_pct = MD/mean_ref*100,
    N = length(GLUK),

```

```
)
```

```
### ONLY those with more than 14 cycles per calculation
```

```
table_shot_red <- filter(table_shot, n_per_cycle >14)
```

```
boxplot_table_targetvalues <- ddply(table_shot_red, c('QC._LEVEL'), summarise,
    median = median(MD),
    mean = mean(MD),
    N = length(MD),
    target = mean(mean_ref),
    Q05 = round(quantile(MD, .05), digits = 2),
    Q95 = round(quantile(MD, .95), digits = 2)
)
```

```
sum_percent_short <- ddply(table_shot_red, c( 'QC._LEVEL'), summarise,
    MD_pct_av = mean(MD_pct),
    sd_pct_av = sd(MD_pct)
)
```

```
p <- ggplot(bb_all, aes(x = QC._LEVEL, y = md_cycle))+
  geom_boxplot(outlier.shape =1)+
  theme_bw()+ theme(panel.grid = element_blank())+
  ylim(0,2) + xlab('')+ ylab('MD [mmol/L]')+ggtitle('MDcut-off QC material short
term')
```

```
p
```

```
### Regression plot
```

```
tab <- as.data.frame(c('3.3'=round(quantile(bb.low$md_cycle, .95), digits =
3),'6.6'=round(quantile(bb.med$md_cycle, .95), digits =
2),'19.7'=round(quantile(bb.upp$md_cycle, .95), digits = 2))
)
```

```
names(tab) <- 'MD_Q95_cut'
```

```
tab$target <- row.names(tab)
```

```
tab$target <- gsub('.95%', '', tab$target)
```

```
tab$target <- as.numeric(tab$target)
```

```
## get the equation
```

```
lm_eqn <- function(df){
  m <- lm(y ~ x, df);
```

```

eq <- substitute(italic(y) == a + b %.% italic(x)*", "~italic(r)^2~"=~r2,
                 list(a = format(coef(m)[1], digits = 2),
                      b = format(coef(m)[2], digits = 2),
                      r2 = format(summary(m)$r.squared, digits = 3)))
as.character(as.expression(eq));
}

names(tab) <- c('y', 'x')
lm_eqn(tab)

# Equation see below
#0.052*x 0.032 = y
#x = 7 ; (0.052*7)+0.032 = 0.396 = y

x <- 7.0
y <- 0.396
# then you can use:
plot(x = tab$x, y = tab$y, pch = 1, cex=1.5,xaxt='n', xlab = 'Glucose
concentration [mmol/L]', ylab = 'MD cut-off [mmol/L]')
axis(side = 1, at=c(5,7,10,15))
lines(x=c(x,x), y=c(0,y), lwd=1,lty = 2)
lines(x=c(0,x), y=c(y,y), lwd=1, lty = 2)
lm(tab$y ~ tab$x)
abline( 0.03222 ,0.05163,lwd=1, col= 'blue')
abline(h=0.70,lwd=1,lty = 2 )

#### TWO-way ANOVA
low <- table_shot_red[which(table_shot_red$QC._LEVEL == 'low'),]
med <- table_shot_red[which(table_shot_red$QC._LEVEL == 'med'),]
upp <- table_shot_red[which(table_shot_red$QC._LEVEL == 'upp'),]

ede <- table_shot_red[which(table_shot_red$SYSTEM == 'ede'),]
dieter <-table_shot_red[which(table_shot_red$SYSTEM == 'dieter'),]
caecar<-table_shot_red[which(table_shot_red$SYSTEM == 'caesar'),]
sys4<-table_shot_red[which(table_shot_red$SYSTEM == 'flexlab'),]

material_list <- list(low, med, upp)

material_list <- list(ede, dieter, caecar, sys4)
summary(material_list)

for(i in 1:length(material_list)){
  dat <- as.data.frame(material_list[i])
  fit <- lm(MD_pct ~ DAY , data = dat) # GERAET or JAHR or DAY
  aov1 <- aov(fit)
  print(summary(aov1) )
  # Tukey Honestly Significant Differences
  group_test <- HSD.test(aov1, 'DAY') # GERAET or JAHR or DAY
  print(group_test)
}
head(table_shot_red)

```

```
table_shot_red$combi <- paste(table_shot_red$SYSTEM, table_shot_red$QC._LEVEL,  
sep = '_')
```

```
fit <- lm(MD_pct ~ combi , data = table_shot_red) # GERAET or JAHR or SYSTEM  
aov1 <- aov(fit)  
print(summary(aov1) )  
# Tukey Honestly Significant Differences  
group_test <- HSD.test(aov1, 'combi') # GERAET or JAHR or SYSTEM  
print(group_test)
```

```
#####  
##### Work load plots
```

```
work <- read.csv('IQC_Studie_Probenzahl.csv')  
dates <- strsplit(as.character(work$DATUM), split="/")  
work$day<-sapply(dates, function(x) paste(x[1]))  
work$month <-sapply(dates, function(x) paste(x[2]))
```

```
work <- work[which(work$month=='09'),]  
work$day <- as.numeric(work$day)  
work <- work[which(work$day >14 & work$day<22),]
```

```
p <- ggplot(work, aes(x = ZEITBER, y = ANZAHL))+  
  geom_bar(stat="identity")+  
  theme_bw()+ theme(panel.grid = element_blank())+  
  xlab('Hour of the day')+ ylab('Accumulated  
workload')+ggtitle('')+scale_x_continuous(limits=c(0, 25), breaks=c(0:25,1))  
p
```

```
p <- ggplot(work, aes(x = WOCHENTAG, y = ANZAHL))+  
  geom_bar(aes(fill = GERAET), stat="identity")+  
  theme_bw()+ theme(panel.grid = element_blank())+ scale_fill_grey()+  
  xlab('Day of week')+ ylab('Accumulated workload')+ggtitle('')  
+scale_x_discrete(  
limits=c('Montag', 'Dienstag', 'Mittwoch', 'Donnerstag', 'Freitag', 'Samstag',  
'Sonntag'))  
p
```

## Supplement S2

Analysis of variance between instruments (I) and materials (II) across years/days (III) for long term (A) and short term (B).

**A)**

(I)

| <b>Instrument</b> | <b>%MD</b> | <b>Group<br/>(P&lt; 0.05)</b> |
|-------------------|------------|-------------------------------|
| 3                 | 4.6        | a                             |
| 2                 | 3.9        | ab                            |
| 1                 | 3.5        | b                             |

(II)

| <b>Target 3.4</b>  | <b>%MD</b> | <b>Group<br/>(P&lt; 0.05)</b> |
|--------------------|------------|-------------------------------|
| 1                  | 4.2        | a                             |
| 3                  | 3.9        | ab                            |
| 2                  | 3.6        | b                             |
| <b>Target 14.7</b> |            |                               |
| 1                  | 4.1        | a                             |
| 3                  | 4.0        | a                             |
| 2                  | 3.3        | b                             |
| <b>Target 5.4</b>  |            |                               |
| 3                  | 5.0        | a                             |
| 1                  | 3.5        | b                             |
| 2                  | 3.3        | b                             |
| <b>Target 19.1</b> |            |                               |
| 3                  | 4.6        | a                             |
| 2                  | 3.9        | ab                            |
| 1                  | 3.5        | b                             |

(III)

| <b>Instrument</b> | <b>Year</b> | <b>T3.4<br/>(%MD)</b> | <b>groups<br/>(p&lt;0.05)</b> | <b>T14.7<br/>(%MD)</b> | <b>groups<br/>(p&lt;0.05)</b> |
|-------------------|-------------|-----------------------|-------------------------------|------------------------|-------------------------------|
| 1                 | 2008        | 5.4                   | a                             | 6.9                    | a                             |
| 1                 | 2009        | 4.3                   | ab                            | 4.2                    | b                             |
| 1                 | 2010        | 4.5                   | ab                            | 4.0                    | b                             |
| 1                 | 2011        | 4.3                   | ab                            | 4.1                    | b                             |
| 1                 | 2012        | 3.9                   | ab                            | 3.3                    | b                             |
| 1                 | 2013        | 3.6                   | b                             | 3.3                    | b                             |
| 2                 | 2009        | 4.4                   | a                             | 3.7                    | a                             |
| 2                 | 2010        | 3.5                   | a                             | 3.8                    | a                             |
| 2                 | 2011        | 3.7                   | a                             | 3.6                    | a                             |
| 2                 | 2012        | 3.4                   | a                             | 2.8                    | a                             |
| 2                 | 2013        | 3.2                   | a                             | 3.0                    | a                             |
| 3                 | 2010        | 4.5                   | a                             | 4.8                    | a                             |
| 3                 | 2011        | 3.6                   | a                             | 3.6                    | a                             |
| 3                 | 2012        | 3.7                   | a                             | 3.4                    | a                             |

|                   |             |                       |                               |                        |                               |
|-------------------|-------------|-----------------------|-------------------------------|------------------------|-------------------------------|
| 3                 | 2013        | 3.9                   | a                             | 4.3                    | a                             |
| <b>Instrument</b> | <b>Year</b> | <b>T5.4<br/>(%MD)</b> | <b>groups<br/>(p&lt;0.05)</b> | <b>T19.1<br/>(%MD)</b> | <b>groups<br/>(p&lt;0.05)</b> |
| 1                 | 2014        | 4.4                   | a                             | 3.8                    | a                             |
| 1                 | 2015        | 3.4                   | a                             | 3.2                    | a                             |
| 1                 | 2016        | 3.3                   | a                             | 3.5                    | a                             |
| 1                 | 2017        | 2.9                   | a                             | 3.7                    | a                             |
| 1                 | 2018        | 3.2                   | a                             | 3.1                    | a                             |
| 2                 | 2014        | 2.7                   | a                             | 2.7                    | b                             |
| 2                 | 2015        | 2.6                   | a                             | 2.6                    | b                             |
| 2                 | 2016        | 3.4                   | a                             | 3.8                    | ab                            |
| 2                 | 2017        | 3.6                   | a                             | 6.2                    | a                             |
| 2                 | 2018        | 4.6                   | a                             | 4.3                    | ab                            |
| 3                 | 2014        | 4.8                   | a                             | 4.8                    | a                             |
| 3                 | 2015        | 5.5                   | a                             | 4.4                    | a                             |
| 3                 | 2016        | 4.7                   | a                             | 4.3                    | a                             |
| 3                 | 2017        | 5.0                   | a                             | 4.6                    | a                             |
| 3                 | 2018        | 5.0                   | a                             | 4.7                    | a                             |

**B)****(I)**

| <b>Instrument</b> | <b>%MD</b> | <b>Group<br/>(P&lt; 0.05)</b> |
|-------------------|------------|-------------------------------|
| Flexlab           | 5.08       | a                             |
| Instrument 3      | 3.72       | b                             |
| Instrument 2      | 3.27       | b                             |
| Instrument 1      | 3.00       | b                             |

**(II)**

| <b>Target 3.3</b>  | <b>%MD</b> | <b>Group<br/>(P&lt; 0.05)</b> |
|--------------------|------------|-------------------------------|
| Instrument 1       | 3.08       | c                             |
| Instrument 2       | 3.82       | bc                            |
| Instrument 3       | 4.51       | abc                           |
| Flexlab            | 5.65       | a                             |
| <b>Target 6.6</b>  |            |                               |
| Instrument 1       | 3.28       | a                             |
| Instrument 2       | 3.03       | a                             |
| Instrument 3       | 3.43       | ab                            |
| Flexlab            | 4.99       | b                             |
| <b>Target 19.7</b> |            |                               |
| Instrument 1       | 2.68       | a                             |
| Instrument 2       | 2.96       | a                             |
| Instrument 3       | 3.20       | ab                            |
| Flexlab            | 4.61       | b                             |

**(III)**

| <b>Instrument 3</b> | <b>%MD</b> | <b>Group<br/>(P&lt; 0.05)</b> |
|---------------------|------------|-------------------------------|
| Day 1               | 3.44       | a                             |
| 2                   | 3.97       | a                             |
| 3                   | 3.29       | a                             |
| 4                   | 4.13       | a                             |
| 5                   | 3.42       | a                             |
| 6                   | 4.04       | a                             |
| <b>Instrument 2</b> |            |                               |
| Day 0               | 3.62       | a                             |
| 1                   | 3.35       | a                             |
| 2                   | 2.87       | a                             |
| 3                   | 2.70       | a                             |
| 4                   | 4.07       | a                             |
| 5                   | 2.40       | a                             |
| 6                   | 4.15       | a                             |
| 7                   | 3.00       | a                             |
| <b>Instrument 1</b> |            |                               |
| Day 0               | 3.17       | a                             |
| 1                   | 2.70       | a                             |
| 2                   | 2.83       | a                             |

|   |      |   |
|---|------|---|
| 3 | 3.49 | a |
| 4 | 2.19 | a |
| 5 | 2.41 | a |
| 6 | 3.59 | a |
| 7 | 3.44 | a |

**Flexlab**

---

|       |      |    |
|-------|------|----|
| Day 1 | 3.22 | a  |
| 2     | 4.56 | ab |
| 3     | 5.45 | ab |
| 4     | 5.19 | ab |
| 5     | 4.91 | ab |
| 6     | 6.44 | b  |
| 7     | 5.78 | b  |
